# Supplementary material
Source: PubMed Central journal article supplement (PMC4788324)
Supplement: dowg827006.ww1_default.pdf [file dowg827006.ww1_default.pdf]

Suggested assessment checklist for trained colorectal nurses

|                                                    |              |                  |
|----------------------------------------------------|--------------|------------------|
| Checklist:                                         |              |                  |
| Had colorectal surgery?                            | Yes          | No               |
| Sexually active?                                   | Yes          | No               |
| Want to be sexually active?                        | Yes          | No               |
| Erectile dysfunction discussed?                    | Yes          | No               |
| Preference for advice (location)?                  | Primary care | Not primary care |
| Preference (clinician/gender)?                     | Male         | Female           |
|                                                    | Doctor       | Nurse            |
| Offered initial erectile dysfunction treatment?    | Yes          | No               |
| Received erectile dysfunction treatment?           | Yes          | No               |
| Erectile dysfunction treatment successful?         | Yes          | No               |
| Offered further erectile dysfunction treatment?    | Yes          | No               |
| Further erectile dysfunction treatment successful? | Yes          | No               |
| Further erectile dysfunction treatment offered?    | Yes          | No               |
